# Supplementary material for: Colletotrichum orbiculare FAM1 Encodes a Novel Woronin Body-Associated Pex22 Peroxin Required for Appressorium-Mediated Plant Infection
Source: PubMed Central journal article supplement — mBio. 2015 Sep 15;6(5):e01305-15. doi: 10.1128/mBio.01305-15 (PMC4600112; doi:10.1128/mbio.01305-15), 2015-09-15
Supplement: mbo004152466sf1.pdf [file mbo004152466sf1.pdf]

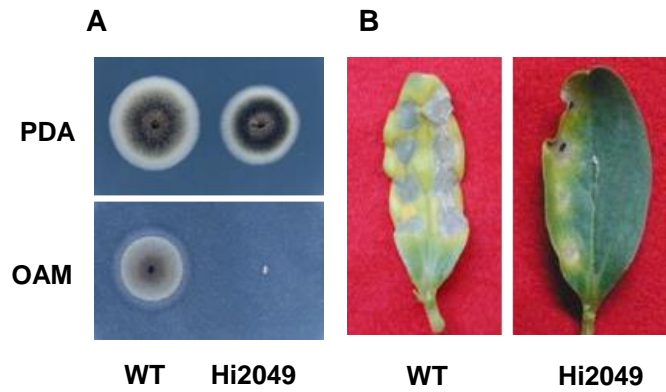

**FIGURE S1** Isolation of *C. orbiculare* mutant deficient in fatty acid metabolism. (A) Colonies of the wild-type (WT) and Hi2049 mutant strain grown on PDA and (OAM, for 5 or 12 days, respectively. (B) Pathogenicity of the *C. orbiculare* wild-type strain and the Hi2049 mutant strain on detached cucumber cotyledons. Leaves were inoculated with droplets of conidial suspension and incubated for 7 days. The right half of the leaves was intact while the left half was wounded by toothpick scratching.
