# Supplementary material for: Colletotrichum orbiculare FAM1 Encodes a Novel Woronin Body-Associated Pex22 Peroxin Required for Appressorium-Mediated Plant Infection
Source: PubMed Central journal article supplement — mBio. 2015 Sep 15;6(5):e01305-15. doi: 10.1128/mBio.01305-15 (PMC4600112; doi:10.1128/mbio.01305-15), 2015-09-15
Supplement: mbo004152466sf4.pdf [file mbo004152466sf4.pdf]

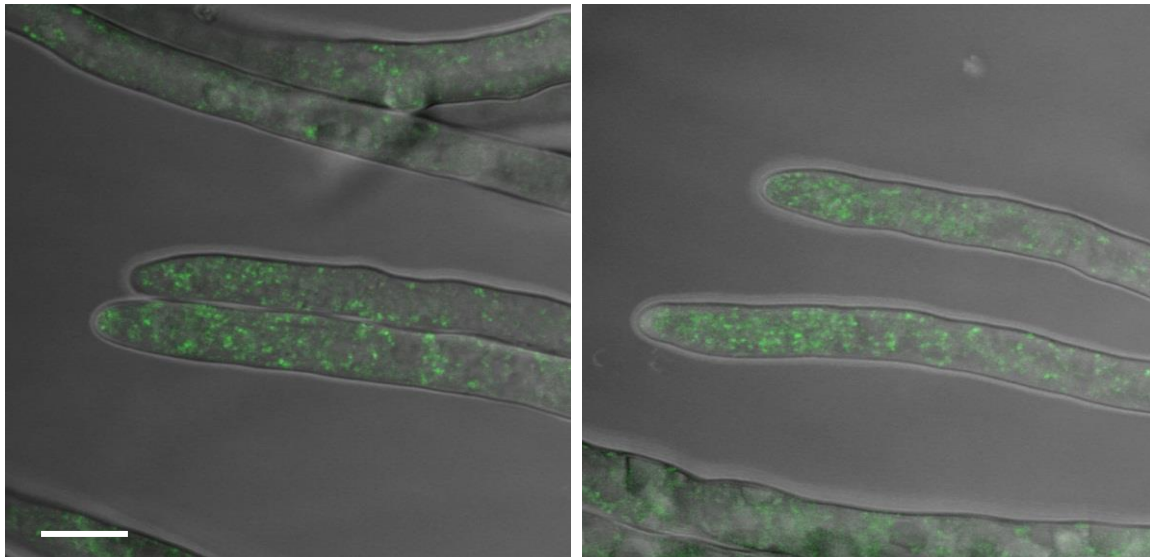

*copex13*

*copex6*

**FIGURE S4** Subcellular localization of Fam1 in peroxisome deficient mutants. Fam1-GFP was expressed in vegetative hyphae of peroxisome deficient mutants *copex13* and *copex6* growing on PDA. Confocal microscopy showed Fam1-GFP neither localized at hyphal tips nor septa in these peroxisome mutants. Numerous small punctate structures labelled by Fam1-GFP were randomly distributed through the cytoplasm. Images represent overlay projections of bright-field and GFP fluorescence channels. Scale bars, 5  $\mu$ m.
