# Supplementary material for: Colletotrichum orbiculare FAM1 Encodes a Novel Woronin Body-Associated Pex22 Peroxin Required for Appressorium-Mediated Plant Infection
Source: PubMed Central journal article supplement — mBio. 2015 Sep 15;6(5):e01305-15. doi: 10.1128/mBio.01305-15 (PMC4600112; doi:10.1128/mbio.01305-15), 2015-09-15
Supplement: mbo004152466sf6.pdf [file mbo004152466sf6.pdf]

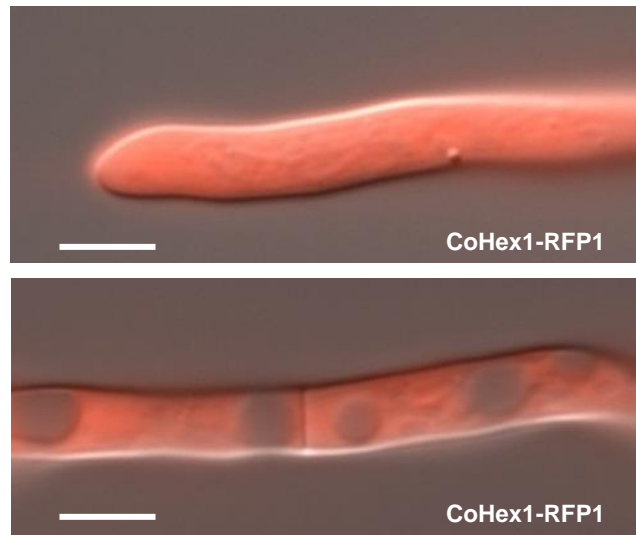

**FIGURE S6** Subcellular localization of CoHex1 in the *fam1* mutant. CoHex1-RFP was expressed in vegetative hyphae of peroxisome *fam1*. CoHex1-RFP neither localized at hyphal tips nor septa. CoHex1-RFP was distributed through the cytoplasm. Images represent overlay projections of bright-field and GFP fluorescence channels. Scale bars, 5  $\mu$ m.
