# Supplementary material for: Colletotrichum orbiculare FAM1 Encodes a Novel Woronin Body-Associated Pex22 Peroxin Required for Appressorium-Mediated Plant Infection
Source: PubMed Central journal article supplement — mBio. 2015 Sep 15;6(5):e01305-15. doi: 10.1128/mBio.01305-15 (PMC4600112; doi:10.1128/mbio.01305-15), 2015-09-15
Supplement: mbo004152466sf7.pdf [file mbo004152466sf7.pdf]

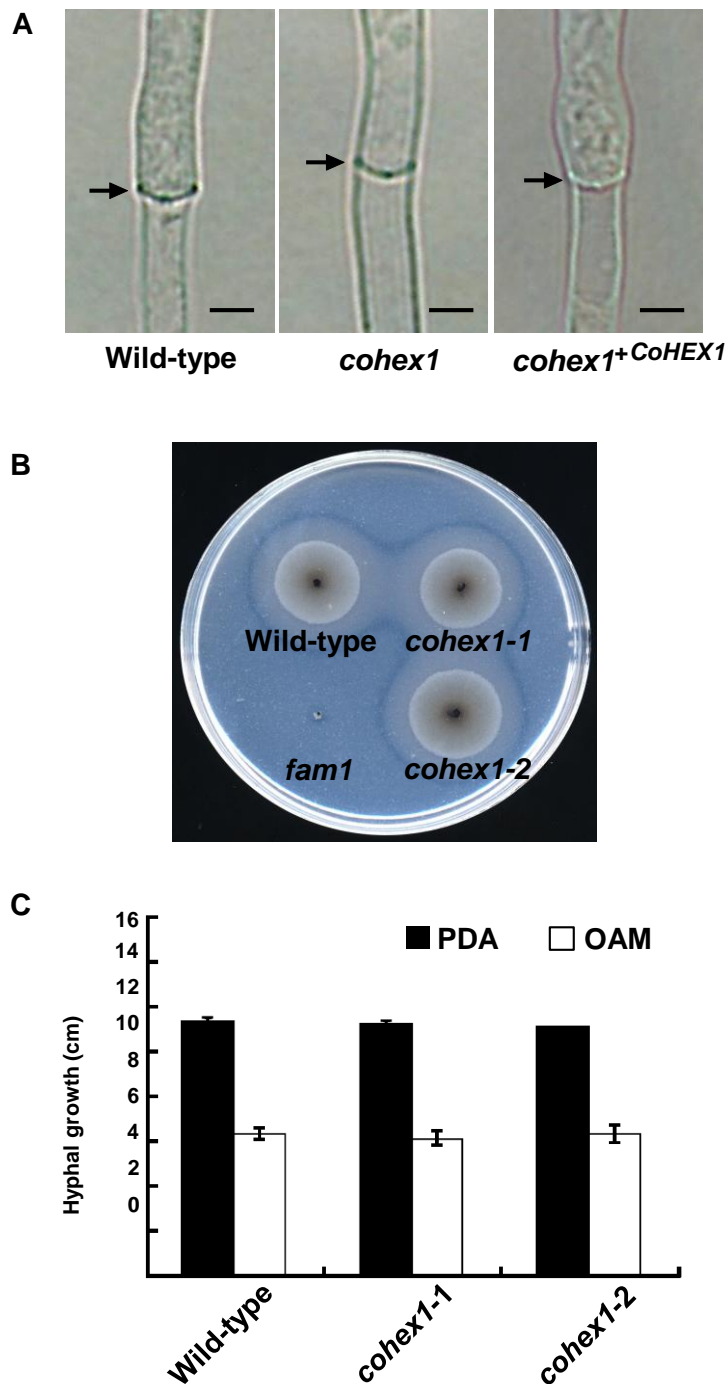

**FIGURE S7** The *cohex1* mutant is defective in WB function. (A) Bright-field microscopy images showing the blockage of cytosolic bleeding from subapical cells following hyphal tip rupture. When distilled water was placed onto hyphae growing on Mathur's agar medium containing 2 % sorbose, hyphal tips swelled and burst. The cytoplasm leaked from subapical cells of the *cohex1* mutant but was retained in those of the wild-type and *cohex1*<sup>+CoHex1</sup> complemented strain. Arrows represented the first septum behind the hyphal tip. Scale bars, 3  $\mu$ m. (B) Mycelial radial growth of the *C. orbiculare* wild-type, *fam1* mutant and *cohex1* mutants after 12 days on OAM. (C) Radial growth rate of the wild-type and *cohex1* mutant on PDA or OAM. The increase in colony diameters was measured between 3 and 7 days on PDA and between 4 and 14 days on OAM. The mean and standard deviation were calculated from six colonies of each strain.
