# Supplementary material for: Colletotrichum orbiculare FAM1 Encodes a Novel Woronin Body-Associated Pex22 Peroxin Required for Appressorium-Mediated Plant Infection
Source: PubMed Central journal article supplement — mBio. 2015 Sep 15;6(5):e01305-15. doi: 10.1128/mBio.01305-15 (PMC4600112; doi:10.1128/mbio.01305-15), 2015-09-15
Supplement: mbo004152466st1.pdf [file mbo004152466st1.pdf]

TABLE S1 Primers used in this study

---

|              |                                        |
|--------------|----------------------------------------|
| CoFAM1BamAS1 | CGGGATCCTCAATCCCGTCCTTGAACG            |
| CoHEX1-S2    | ATCCCCTGCCACCACATCC                    |
| CoHEX1-AS2   | TCGCCAGTCTCGGTCATGG                    |
| CoPEX4f-S2   | GGACTAGTAACACAATGTCGTGGCGGATCCAGA      |
| CoPEX4f-AS2  | GTGCGGCCGCTCATGGCCGTCATACCGC           |
| CoWSC-S1-Sp  | GCACTAGTTCTGTCATCTGTCGGCTACG           |
| CoWSC-AS1-EI | CGGAATTCGTAAGGAGGGTTAGGACCGCC          |
| EGFPsgly     | GACCAAGCTTGGTGGTGGTGGTATGGTGAGCAAG     |
| FAM1deS-AS   | CGGGATCCATCCCGTCCTTGAACGCG             |
| FAM1proS1    | CGGGATCCGTGCGGTAGCAAAAGTCGAT           |
| FAM1yesS1    | GCGGATCCAACACAATGTCGTGGAACGATCAAC      |
| GA-AS1       | GCGGTGCACCTGTCTGGTCTTCTACACGAA         |
| glyRFP-S     | CGGAATTCGGTGGTGGTGGTATGGCCTCCTCCGAGGAC |
| HEX1dsr1-AS  | CGGAATTCGCCGTGGATGACCTTGAC             |
| mRFP1AS1     | CGGAATTCTTAGGCGCCGGTGGAGTG             |
| mRFP1S1      | GGACTAGTCAGACACAATGGCCTCCTCCGAGGAC     |
| PEX4-AS2     | CGTCCAGGCGTCCTTGAG                     |
| PEX4-S2      | GCGATCAAGAGGCTCATCAA                   |
| PEX4-seqAS1  | TTGATGACGGCCTCCCAC                     |
| PEX4-seqS1   | TTGATGACGGCCTCCCAC                     |
| PTS1RFP-AS   | GGCGGATCCTTACAGCTTCGAGGCGCCGGTGGAGTG   |
| RFPsr1-AS    | GCGGATCCTTACAGGCGGGAGGCGCCGGTGGAGTG    |

---
